# Supplementary material for: Luminescent supramolecular assemblies based on hydrogenbonded complexes of stilbenecarboxylic acids and dithieno[3,2b:2′,3′d]thiophene2carboxylic acids with a tris(imidazoline) base
Source: Royal Society of Chemistry journal article supplement (doi:10.1039/b009406o), 2001-01-01
Supplement: b009406o.doc [file b009406o.doc]

**Luminescent supramolecular assemblies based on hydrogen-bonded complexes of stilbenecarboxylic acids and dithieno[3,2-*b*;2',3'-*d*]thiophene-2-carboxylic acids with a tris(imidazoline) base**

*Frank Osterod, Lars Peters, Arno Kraft, Takeshi Sano, John J. Morrison, Neil Feeder, and Andrew B. Holmes*

Different packing views in crystal structure of **14f:**

***trans*-4-[2-(4-Methoxyphenyl)vinyl]benzoic acid 3*E***

The compound has been described in the literature,[[1]](#footnote-2) but it was prepared before by a different route. Sodium ethanolate [prepared from sodium (115 mg, 5.00 mmol) and dry ethanol (10 cm3)] were slowly combined with **1**[[2]](#footnote-3) (477 mg, 1.00 mmol). 4-Methoxybenzaldehyde **2** (136 mg, 1.00 mmol) was added dropwise and heated to 80 °C for 1 h. The precipitate was collected by suction filtration, treated with H2O (250 cm3) and concd. HCl. Sublimation (230 °C/10–2 mbar) gave **3*E*** as a colourless solid, mp 270 °C (Found: C, 75.4; H, 5.6. C16H14O3 requires C, 75.6; H, 5.55%); *v*max (KBr, cm–1) 1684, 1597, 1509, 1423, 1290, 1251, 1179, 1028, 848; H([2H6]DMSO, 500 MHz) 3.79 (3 H, s, OCH3), 6.97, 7.59 (2 × 2 H, AA'XX', ArH), 7.17 (1 H, AB, *J* 16.4, =CH), 7.36 (1 H, AB, *J* 16.4, =CH), 7.67, 7.92 (2 × 2 H, AA'XX', ArH); C([2H6]DMSO, 125 MHz) 55.5, 114.6, 125.4, 126.4, 128.6, 130.1, 131.0 (CH, CH3), 129.5, 129.6, 142.1, 159.8, 167.5 (*ipso*-C, C=O); *m/z* (CI, NH3) 289 (M + NH3 + NH4+, 32%), 274, 273, 272 (M + NH4+, 35, 22, 100), 254 (M + H+, 20). After a solution of the NMR sample was left standing in the sunlight, additional signals could be detected and were attributed to **3*Z***: H([2H6]DMSO, 500 MHz) 3.73 (3 H, s, OCH3), 6.57 (1 H, AB, *J* 12.0, =CH), 6.67 (1 H, AB, *J* 12.0, =CH), 6.83, 7.14 (2 × 2 H, AA'XX', ArH), 7.33, 7.83 (2 × 2 H, AA'XX', ArH).

**Ethyl 4-[(diethoxyphosphoryl)methyl]benzoate** **5**[[3]](#footnote-4)

The compound was obtained after refluxing 4-(bromomethyl)benzoic acid **4** (8.00 g, 37.2 mmol) and triethyl phosphite (90 cm3, 525 mmol) for 48 h. Excess triethyl ­phosphite was removed, and the residue was distilled (Kugelrohr, 90 °C/10–2 mbar) to afford **5** (4.30 g, 39%) as a colourless oil (Found: C, 55.55; H, 7.25. C14H21PO5 requires C, 56.0; H, 7.05%); *v*max (film, cm–1) 2983, 1717, 1611, 1368, 1277, 1250, 1108, 1055, 1025, 964; H(500 MHz, CDCl3)1.25 (6 H, t, *J* 7.6, CH3), 1.39 (3 H, t, *J* 7.6, CH3), 3.20 (2 H, d, 2*J*H-P 22.1, CH2P), 3.99–4.06 (4 H, m, OCH2), 4.37 (2 H, q, *J* 7.6, OCH2), 7.37 (4*J*H-P 2.5), 7.99 (2 × 2 H, AA'XX', ArH); *m/z* (EI) 300 (M+, 80%), 255 (90), 254 (53), 227 (60), 226 (50), 177 (50), 163 (60), 124 (80), 118 (100).

**(*Z*)-3-(3,4,5-Trimethoxyphenyl)-2-(4-carboxyphenyl)acrylonitrile 10*Z***

A solution of sodium ethanolate (14.6 mmol) in ethanol [10 cm3, prepared by dissolving sodium (1.00 g, 43.7 mmol) in dry EtOH (30 cm3)] was added dropwise to 4-cyanomethylbenzoic acid **9**[[4]](#footnote-5) (1.61 g, 10.0 mmol) and **6** (1.96 g, 10.0 mmol) in dry EtOH (20 cm3) and refluxed for 30 min. The viscous, yellow reaction mixture was diluted with ethanol (40 cm3) and stirred at room temperature overnight. The precipitate was collected by suction filtration, dried, and recrystallised from MeOH–diethyl ether. The solid was redissolved in water and precipitated again by acidification with concd. HCl. Yield: 700 mg (21%), yellow crystals, (isomeric ratio of **10*Z***/**10*E* >** 99 : 1), mp 259–263 °C (Found: C, 67.2; H, 4.9; N, 3.9. C19H17NO5 requires C, 67.25; H, 5.05; N, 4.1%); *v*max(KBr, cm–1) 2218 (CN), 1696, 1507, 1423, 1336, 1298, 1254, 1127; H(500 MHz, [2H6]DMSO) 3.76 (3 H, s, OCH3), 3.85 (6 H, s, OCH3), 7.42 (2 H, s, ArH), 7.87, 8.05 (2 × 2 H, AA'XX', ArH), 8.14 (1 H, s, =CH); C(125 MHz, [2H6]DMSO) 56.3, 60.6, 107.6, 126.1, 130.5, 145.0 (CH, CH3), 108.3, 118.3, 129.1, 131.3, 138.2, 140.4, 153.2, 167.1 (*ipso*-C, CN, C=O); *m/z* (CI, NH3) 358, 357 (M + NH4+, 15, 100%), 339 (M + H+, 6). After a solution of the NMR sample was left standing in the sunlight, additional signals could be detected and were attributed to **10*E***: H(500 MHz, [2H6]DMSO) 3.49 (6 H, s, OCH3), 3.65 (3 H, s, OCH3), 6.53 (2 H, s, ArH), 7.53, 8.02 (2 × 2 H, AA'XX', ArH), 7.65 (1 H, s, =CH).

**2-Fluoren-9-ylidene-2-phenylacetic acid 12**

A solution of fluoren-9-one (54g, 0.3 mol) and phenylacetic acid (51 g, 0.37 mol) in triethylamine (50 cm3) and acetic acid anhydride (50 cm3) were stirred for 15 h at 160 °C. After cooling, water (500 cm3) was added and the solution was acidified with hydrochloric acid and extracted with chloroform. The organic solution was extracted with aqueous NaOH (10%). The aqueous solution was again acidified and extracted with chloroform. The organic solution was concentrated by evaporation. The crude product was further purified by sublimation (170 °C/10–2 mbar). Yield: 22%, yellow transparent crystals, DSC: K/184 (*H* 113 J g–1)/I (lit.[[5]](#footnote-6) m.p. 180–182 °C) (Found: C, 84.3; H, 4.7. C21H14O2 requires C, 84.5; H, 4.7); max (KBr)/cm–1 3060, 1690, 1446, 1273, 728; H(500 MHz, CD3OD) 6.47 (1 H, d, *J* 7.9), 6.86 (1 H, dd, *J* 7.6, 7.9), 7.25 (1 H, dd, *J* 7.6, 7.9), 7.29 (1 H, dd, *J* 7.6, 7.9), 7.40 (1 H, t, *J* 7.6), 7.49–7.55 (5 H, m), 7.70 (1 H, d, *J* 7.6), 7.76 (1 H, d, *J* 7.6), 7.88 (1 H, d, *J* 7.6); C(125 MHz, CD3OD) 121.0, 121.1, 125.1, 126.8, 128.1, 128.7, 130.2, 130.4, 130.5, 130.66, 130.69 (CH), 135.2, 136.2, 137.8, 138.4, 138.6, 142.3, 142.5, 173.2 (*ipso*-C, C=O); *m/z* (CI, NH3) 298 (M + H+, 10%), 316 (M + NH4+, 100).

**Diethyl (4-cyanobenzyl)phosphonate 15**

Modified preparation similar to ref.[[6]](#footnote-7): 4-(Bromomethyl)benzonitrile (10.0 g, 51.0 mmol) and triethyl phosphite (100 cm3) were refluxed for 4 h allowing the resulting ethylbromide to distill off, followed by excess triethyl phosphite was removed by distillation (70 °C/20 mbar). The residue was then distilled (Kugelrohr, 140–150 °C/10–2 mbar). Yield: 10.7 g (83%), colourless oil (Found: C, 56.8; H, 6.2; N, 5.65. C12H16NO3P requires C, 56.9; H, 6.4; N, 5.5%); *v*max (film, cm–1) 2984, 2228, 1608, 1249, 1027, 967; H(500 MHz, CDCl3) 1.26 (6 H, t, *J* 7.3, CH3), 3.20 (2 H, d, 2*J*H-P 22.0, CH2–P), 4.01–4.08 (4 H, m, OCH2), 7.42 (4*J*H-P 2.5), 7.61 (2 × 2 H, AA'XX', ArH); C(125 MHz, CDCl3) 16.4, 130.5 (*J*C-P 7.3), 132.3 (CH, CH3), 34.2 (1*J*C-P 138.1), 62.4 (2*J*C-P 7.4, CH2), 110.9 (*J*C-P 3.6), 118.7 (*J*C-P 2.4), 137.6 (*J*C-P 8.4) (*ipso*-C, C=N); P(81 MHz, CDCl3) 25.7; *m/z* (CI, NH3) 288 (M + NH3 + NH4+, 35%), 271 (M + NH4+, 100), 255, 254 (M + H+, 15, 56).

***trans*-4-[2-(4-Methoxyphenyl)vinyl]benzonitrile 16*E***

To a suspension of NaH (0.80 g, 3.00 mmol) in dry THF (4 cm3) was added dropwise within 5 min a solution of **2** (0.41 g, 3.00 mmol) and **15** (0.80 g, 3.00 mmol) in dry THF (10 cm3)–DMF (3 cm3). The reaction mixture was refluxed for 3 h. After addition of H2O at room temperature a colourless solid of **16*E*** was collected by suction filtration. Yield: 0.64 g (91%), mp 148–150 °C (Found: C, 81.8; H, 5.5; N, 5.8. C16H13NO requires C, 81.7; H, 5.5; N, 5.95%); *v*max (KBr, cm–1) 2221 (CN), 1597, 1572, 1513, 1254, 1175, 1031, 836; H(500 MHz, CDCl3) 3.84 (3 H, s, OCH3), 6.93, 7.47 (2 × 2 H, AA'XX', ArH), 6.95 (1 H, d, *J* 16.4, =CH), 7.16 (1 H, d, *J* 16.4, =CH), 7.54, 7.61 (2 × 2 H, AA'XX', ArH); C(125 MHz, CDCl3) 55.4, 114.3, 124.5, 126.6, 128.3, 132.0, 132.4 (CH, CH3), 110.0, 119.1, 129.1, 142.2, 160.1 (*ipso*-C, CN); *m/z* (CI, NH3) 272, 271, 270 (M + NH3 + NH4+, 26, 11, 71%), 255, 254, 253 (M + NH4+, 48, 24, 100), 235 (M + H+, 23); *R*f(CH2Cl2) 0.67.

***trans*-4-[2-(3,4,5-Trimethoxyphenyl)vinyl]benzonitrile 17*E***

After a solution of the NMR sample was left standing in the sunlight, additional signals could be detected and were assigned to **17*Z***: H(500 MHz, CDCl3) 3.67 (6 H, s, OCH3), 3.84 (3 H, s, OCH3), 6.40 (2 H, s, ArH), 6.54 (1 H, AB, *J* 12.0, =CH), 6.67 (1 H, AB, *J* 12.0, =CH), 7.38, 7.54 (2 × 2 H, AA'XX', ArH).

***trans*-5-{4-[2-(4-Methoxyphenyl)vinyl]phenyl}tetrazole 18*E***

Sodium azide (0.72 g, 11.0 mmol), **16*E*** (1.18 g, 5.00 mmol) and NH4Cl (0.59 g, 11.0 mmol) in NMP (15 cm3) were heated to 100 °C for 4 h. The reaction mixture was added dropwise to H2O (100 cm3)–concd. HCl (5 cm3). A colourless precipitate was collected by suction filtration, dried, and further purified by column chromatography (CH2Cl2 and CH2Cl2–MeOH, 4 : 1). Yield: 0.36 g (25%), mp 265 °C (decomp.) (Found: C, 69.2; H, 4.85; N, 20.2. C16H14N4O requires C, 69.05; H, 5.1; N, 20.1%); *v*max (KBr, cm–1) 1602, 1510, 1252, 1053, 1031; H(500 MHz, [2H6]DMSO) 3.79 (3 H, s, OCH3), 6.98, 7.59 (2 × 2 H, AA'XX', ArH), 7.19 (1 H, d, *J* 16.4, =CH), 7.38 (1 H, d, *J* 16.4, =CH), 7.79, 8.03 (2 × 2 H, AA'XX', ArH); *m/z* (CI, NH3) 313 (M + NH3 + NH4+, 42%), 297, 296 (M + NH4+, 17, 100), 279 (M + H+, 70); *R*f(CH2Cl2–MeOH, 4 : 1) 0.40. After a solution of the NMR sample was left standing in the sunlight, additional signals could be detected and were attributed to **18*Z***: H(500 MHz, [2H6]DMSO) 3.74 (3 H, s, OCH3), 6.59 (1 H, AB, *J* 12.3, =CH), 6.68 (1 H, AB, *J* 12.3, =CH), 6.84, 7.18 (2 × 2 H, AA'XX', ArH), 7.45, 7.93 (2 × 2 H, AA'XX', ArH).

**2-Bromodithieno[3,2-*b*;2',3'-*d*]thiophene 25**

To a stirred solution of dithienothiophene **21**[[7]](#footnote-8) (210 mg, 1.1 mmol) in CHCl3–acetic acid (20 cm3, 1 : 1) at 0 °C, NBS (191 mg, 1.1 mmol) was added portionwise and stirred for 1 h. The mixture was allowed to warm to 25 °C and stirred for 2 h. The reaction was neutralised at 0 °C by the addition of 20% of aqueous NaOH. The product was extracted with CHCl3 (2 × 40 cm3), washed with water, dried (MgSO4) and the solvent was removed in vacuum. Purification by chromatography (hexane) gave a yellow solid (196 mg, 65%). The solid was recrystallised from hexane, mp 143 °C (Found: C, 32.5; H, 1.5. C8H3BrS3 requires C, 34.9; H, 1.1%); *v*max (CDCl3, cm–1) 3088, 1476, 1359, 1155, 1084, 956, 867, 802, 701, 597;  (250 MHz, CDCl3) 7.27 (1 H, d, *J* 5.2), 7.29 (1 H, s), 7.38 (1 H, d, *J* 5.2); *m/z* (CI, NH3) 275, 277 (M + H+, 100%); *R*f(hexane) 0.39.

**Dithieno[3,2-*b*;2',3'-*d*]thiophene-2-carbonitrile 26**

A solution of **25** (500 mg, 1.82 mmol) and CuCN (600 mg, 6.70 mmol) in dry NMP (10 cm3) was stirred for 24 h at 200 °C. The solvent was then removed by vacuum distillation and the residue was further purified by column chromatography (CHCl3) to give **26** as a colourless powder (120 mg, 28%), mp 177–178 °C (Found: C, 48.8; H, 1.6; N, 6.3. C9H3NS3 requires C, 48.8; H, 1.4; N, 6.3%); *v*max (CDCl3, cm–1) 2212, 1490, 1438, 1364, 1114, 844, 603; H(500 MHz, CDCl3) 7.35 (1 H, d, *J* 5.2), 7.55 (1 H, d, *J* 5.2), 7.81 (1 H, s); C(62.5 MHz, CDCl3) 108.4, 114.5, 120.9, 129.5, 130.0, 130.9, 135.2, 140.2, 145.7; *m/z* (CI, NH3) 221 (M + H+, 100%); *m/z* (EI) 220.9428 (12C91H314N32S3 requires 220.9428); *R*f(hexane–CH2Cl2, 1 : 1) 0.21.

#### 5-Dithieno[3,2-*b*;2',3'-*d*]thiophen-2-yl-tetrazole 27

A suspension of **26** (150 mg, 0.7 mmol), NaN3 (100 mg, 1.54 mmol) and NH4Cl (53.5 mg, 1.00 mmol) in NMP (10 cm3) was stirred for 48 h at 90 °C. The solvent was then distilled off in a vacuum. The obtained solid was dissolved in HCl (1 M, 25 cm3) and extracted with chloroform. The organic extract was concentrated in a vacuum, and the residue was purified by column chromatography (CHCl3–MeOH, 9 : 1). Yield: 48%, yellow-green solid, decomp. > 240 °C; *v*max (KBr, cm–1) 1589, 1543, 1508, 1363, 1085, 803, 599; H(500 MHz, [2H6]DMSO) 7.54 (1 H, d, *J* 5.2), 7.72 (1 H, d, *J* 5.2), 7.88 (1 H, s); C(125 MHz, [2H6]DMSO) 118.3, 121.4, 127.5 (CH), 129.3, 130.1, 133.6, 141.4, 141.5, 155.3; *m/z* (CI, NH3) 299 (M + NH3 + NH4+, 50%), 282 (M + NH4+, 100%), 265 (M + H+, 50%); *m/z* (EI) 263.9591 (M+, 80%. C9H4N4S3 requires 263.9598), 235.9546 (100%), 208.9466 (80%); *R*f(CHCl3–MeOH, 9 : 1) 0.15.

**General procedure for the preparation of the complexes**: Carboxylic acid or tetrazole (3 equiv.) and **13** (1 equiv.) were dissolved in hot ethanol (40 cm3/mmol) to which a certain amount of CHCl3 (5–10 cm3) had to be added as cosolvent. After filtration of the hot solution and concentration, the crude product was crystallised from the solvent (mixture) indicated for each complex.

**14a:** Yield: 65% (from EtOH–CHCl3), pale yellow crystals, DSC: K1/234 (*H* 8 J g–1)/K2/245 (*H* 8 J g–1)/K3/252 (*H* 16 J g–1)/I (Found: C, 72.2; H, 5.8; N, 7.85. C63H60N6O9 requires C, 72.4; H, 5.8; N, 8.0%); max (CHCl3–MeOH, 24 : 1) 332 nm ( 120000 M–1 cm–1); *v*max (KBr, cm–1) 1598, 1511, 1379, 1251, 1177; H(500 MHz, CDCl3–CD3OD; 7 : 1) 3.84 (9 H, s, OCH3), 4.08 (12 H, s, NCH2), 6.92, 7.48 (2 × 6 H, AA'XX', ArH), 7.00 (1 H, AB, *J* 16.3, =CH), 7.15 (1 H, AB, *J* 16.3, =CH), 7.52, 8.00 (2 × 6 H, AA'XX', ArH), 9.34 (3 H, s, HA).

**14c**: Yield: 76% (from EtOH–CHCl3), yellow crystals, DSC: K1/196 (*H* 16 J g–1)/K2/258 (*H* 55 J g–1)/Idecomp. (Found: C, 65.9; H, 5.45; N, 9.3. C72H69N9O15 × H2O requires C, 65.6; H, 5.4; N, 9.6%); max (CHCl3) 348 nm ( 73000 M–1 cm–1); *v*max (KBr, cm–1) 2212 (CN), 1638, 1582, 1507, 1384, 1335, 1127; H(500 MHz, CDCl3) 3.93 (9 H, s, OCH3), 3.94 (18 H, s, OCH3), 4.19 (12 H, s, NCH2), 7.22 (6 H, s, ArH), 7.53 (3 H, s, =CH), 7.70, 8.14 (2 × 6 H, AA'XX', ArH), 10.09 (3 H, s, HA); C(125 MHz, [2H6]DMSO) 47.9 (CH2), 55.9, 60.2, 107.1, 125.3, 129.5, 129.9, 144.0 (CH, CH3), 108.2, 118.2, 128.5, 128.7, 134.1, 136.6, 139.8, 152.8, 162.9, 167.7 (*ipso*-C, CN, C=O). After exposure of an NMR sample to sunlight for several hours, a chloroform solution showed additional 1H NMR signals for the (*E*) isomer, H(500 MHz, CDCl3) 3.58 (18 H, s, OCH3), 3.83 (9 H, s, OCH3), 6.40 (6 H, s, ArH), 7.30 (3 H, s, =CH), 7.45, 8.09 (2 × 6 H, AA'XX', ArH).

**14d:** Yield: 80% (from EtOH–CHCl3), colourless crystals, DSC: K1/246 (*H* 70 J g–1)/K2/259 (*H* 33 J g–1)/I (Found: C, 75.45; H, 5.6; N, 8.6. C60H54N6O6 requires C, 75.5; H, 5.7; N, 8.8%); max (CHCl3) 278 nm ( 65000 M–1 cm–1); *v*max (KBr, cm–1) 1638, 1580, 1377, 1352, 1290, 708, 694; H(500 MHz, CDCl3)3.73 (12 H, s, NCH2), 6.99–7.03 (6 H, m), 7.08–7.14 (10 H, m), 7.23–7.34 (14 H, m, ArH), 7.76 (3 H, s, =CH), 10.01 (3 H, s, HA); C(125 MHz, CDCl3) 45.0 (CH2), 126.7, 127.7, 127.9, 128.2, 129.9, 130.1, 135.0, 135.9 (CH), 125.3, 136.1, 139.2, 139.5, 163.0, 174.7 (*ipso*-C, C=N, C=O).

**14e:** Yield: 67% (from MeCN–CHCl3), pale yellow solid, DSC: K1/172 (*H* 14 J g–1)/K2/288 (*H* 94 J g–1)/I (Found: C, 79.9; H, 5.3; N, 6.8. C78H60N6O6 requires C, 79.6; H, 5.1; N, 7.1%); max (KBr)/cm–1 3057, 1638, 1578, 1447, 1377, 732; H(500 MHz, CDCl3–CD3OD, 7 : 5) 3.82 (12 H, s, NCH2), 6.58 (3 H, d, *J* 7.9), 6.88 (3 H, dd, *J* 7.6, 7.9), 7.10 (3 H, dd, *J* 7.6, 7.9), 7.21 (3 H, dd, *J* 7.6, 7.9), 7.27 (3 H, t, *J* 7.9), 7.45–7.50 (9 H, m), 7.55–7.58 (6 H, m), 7.63 (3 H, d, *J* 7.6), 7.67 (3 H, d, *J* 7.6), 7.97 (3 H, d, *J* 7.6, ArH), 8.68 (3 H, s, HA); C(125 MHz, CDCl3–CD3OD, 7 : 5) 46.9 (CH2), 121.0, 121.1, 124.9, 126.3, 128.2, 128.3, 129.6, 129.8, 130.0, 130.1, 130.5, 134.8 (CH), 138.7, 139.4, 139.8, 141.7, 141.8, 164.8 (*ipso*-C, C=N, C=O).

**20a:** After a solution of the NMR sample was left standing in the sunlight, additional signals could be detected and were attributed to the (*E*) isomer, H(500 MHz, CDCl3–[2H6]DMSO, 1 : 1) 3.76 (9 H, s, OCH3), 6.52 (3 H, AB, *J* 12.3, =CH), 6.56 (3 H, AB, *J* 12.3, =CH), 6.78, 7.19 (2 × 6 H, AA'XX'), 7.31, 7.92 (2 × 6 H, AA'XX', ArH).

**20b:** Exposure of a solution in CDCl3 to sunlight led to an increase in the percentage of *cis* isomer, H(500 MHz, CDCl3, 10–3 M) 3.67 (18 H, s, OCH3), 3.85 (9 H, s, OCH3), 6.48 (6 H, s, ArH), 6.60 (3 H, AB, *J* 12.1, =CH), 6.64 (3 H, AB, *J* 12.1, =CH), 7.45, 7.95 (2 × 6 H, AA'XX', ArH).

**20c:** Yield: 40% (from EtOH), yellow-green solid, decomp. > 240 °C; H(500 MHz, [2H6]DMSO) 3.99 (12 H, s, N-CH2), 7.54 (3 H, d, *J* 5.2), 7.72 (3 H, d, *J* 5.2), 7.90 (3 H, s), 8.66 (3 H, s, ArH); C(125 MHz, [2H6]DMSO) 46.1 (CH2), 118.5, 121.4, 127.6, 131.8 (CH), 125.9, 129.5, 130.1, 133.0, 141.5, 155.2, 163.2.

1. S. Vaday, H. C. Geiger, B. Cleary., J. Perlstein and D. G. Whitten, *J. Phys. Chem. B*, 1997, **101**, 321. [↑](#footnote-ref-2)
2. R. A. Aitken, M. J. Drysdale, L. Hill, K. W. Lumbard, J. R. MacCallum and S. Seth, *Tetrahedron*, 1999, **55**, 11039. [↑](#footnote-ref-3)
3. L. Borowiecki, A. Kazubski, E. Reca and W. Wodzki, *Liebigs Ann. Chem.*, 1985, 929. [↑](#footnote-ref-4)
4. J. R. Piper, J. I. DeGraw, W. T. Colwell, C. A. Johnson, R. L. Smith, W. R. Waud and F. M. Sirotnak, *J. Med. Chem*., 1997, **40**, 377. [↑](#footnote-ref-5)
5. (*a*) S. L. Solar and R. M. Lindquist, *J. Am. Chem. Soc.*, 1960, **82**, 4285; (*b*) K. Koguro, T. Oga, S. Mitsui, R. Orita, *Synthesis*,1998, 910. [↑](#footnote-ref-6)
6. F. Kagan, R. D. Birkenmeyer and R. E. Strube, *J. Am. Chem. Soc.*, 1959, **81**, 3026. [↑](#footnote-ref-7)
7. X.-C. Li, H. Sirringhaus, F. Garnier, A. B. Holmes, S. C. Moratti, N. Feeder, W. Clegg, S. J. Teat and R. H. Friend, *J. Am. Chem. Soc*., 1998, **120**, 2206. [↑](#footnote-ref-8)
